# Supplementary material for: Perturbation increases source-dependent organic matter degradation rates in estuarine sediments
Source: Copernicus journal article supplement (doi:10.5194/bg-23-995-2026), 2026-02-03
Supplement: Supplementary file 1 [file bg-23-995-2026-supplement.pdf]

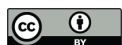

## *Supplement of*

# **Perturbation increases source-dependent organic matter degradation rates in estuarine sediments**

**Guangnan Wu et al.**

*Correspondence to:* Guangnan Wu ([guangnan.wu@nioz.nl](mailto:guangnan.wu@nioz.nl))

The copyright of individual parts of the supplement might differ from the article licence.

23  
24

| TABLE OF CONTENTS                                                                                                                                                    | Page |
|----------------------------------------------------------------------------------------------------------------------------------------------------------------------|------|
| <b>Table S1</b> Composition of artificial rainwater used in aerobic incubation experiments.                                                                          | S3   |
| Determination of homogenized freeze-dried sediment bulk density and porosity.                                                                                        | S3   |
| <b>Table S2</b> MixSIAR modelled marine, riverine, and terrestrial contributions to the OM                                                                           | S4   |
| <b>Table S3</b> Identified MOM pyrolysis products.                                                                                                                   | S6   |
| <b>Fig. S1</b> Relative abundance of aromatics, phytadienes, and pristine in MOM pyrolysis products.                                                                 | S9   |
| <b>Fig. S2</b> The Pearson's correlation matrix of sediment properties.                                                                                              | S9   |
| <b>Fig. S3</b> The concentration of dissolved O <sub>2</sub> , DIC, CH <sub>4</sub> and TA in the overlaying water over time during intact sediment core incubation. | S10  |
| Estimation of contribution by OM degradation to sedimentary DIC efflux.                                                                                              | S10  |
| <b>Fig. S4</b> Benthic flux of dissolved inorganic nitrogen (DIN) and total alkalinity (TA).                                                                         | S11  |
| Benthic diffusive fluxes of Fe <sup>2+</sup> and HS <sup>-</sup> .                                                                                                   | S12  |

25  
26  
27  
28  
29  
30  
31

**Table. S1.** Composition of artificial rainwater used in aerobic incubation experiments for moisture adjustment. The composition was based on the Dutch rainwater (Harpenslager et al., 2015). Chemicals were analytical grade dissolved in milli-Q water.

| Salt                                 | Concentration (mg/L) |
|--------------------------------------|----------------------|
| NaCl                                 | 3.13                 |
| MgSO <sub>4</sub> ·7H <sub>2</sub> O | 1.91                 |
| MgCl <sub>2</sub> ·6H <sub>2</sub> O | 1.22                 |
| CaCl <sub>2</sub> ·H <sub>2</sub> O  | 2.58                 |
| KCl                                  | 1.61                 |

#### Determination of homogenized freeze-dried sediment bulk density and porosity

Bulk density was measured based on the method described in Al-Shammary et al. (2018). Homogenized freeze-dried sediment was carefully poured into a pre-weighed 50-mL graduated cylinder. The cylinder was gently tapped to level the sediment surface at 50-mL mark. The mass ( $m_{dry}$ ) and the volume ( $V_{dry}$ , here 50 mL) of the freeze-dried sediment were then recorded. Bulk density ( $\rho_{bulk}$ ) was calculated as:

$$\rho_{bulk} = \frac{m_{dry}}{V_{dry}}$$

The sediment particle density ( $\rho_{sed}$ ) was assumed to be 2.65 g cm<sup>-3</sup>. Porosity ( $\phi$ ) was calculated according to:

$$\phi = 1 - \frac{\rho_{bulk}}{\rho_{sed}}$$

The required volume of artificial rainwater ( $V_{water}$ ) to adjust water-filled pore space to 60% for 10 g of homogenized freeze-dried sediment was calculated as:

$$V_{water} = \frac{10 \text{ grams}}{\rho_{sed}} \cdot \phi \cdot 60\%$$

Homogenized freeze-dried sediment bulk density ( $\rho_{bulk}$ ) and porosity ( $\phi$ ) were 0.92 g cm<sup>-3</sup> and 0.65 for site 115, 0.72 g cm<sup>-3</sup> and 0.73 for site 86, 1.36 g cm<sup>-3</sup> and 0.49 for site NWWG-02, 0.91 g cm<sup>-3</sup> and 0.66 for site 21A, 0.81 g cm<sup>-3</sup> and 0.69 for site B16, 1.31 g cm<sup>-3</sup> and 0.51 for site K1v2.

66 **Table S2.** MixSIAR modelled marine, riverine, and terrestrial contributions to the OM in 49 PoR  
67 sediments, respectively. Mean value and standard deviation are provided.  
68

| Sediment site | Marine contribution | Riverine contribution | Terrestrial contribution |
|---------------|---------------------|-----------------------|--------------------------|
| 201           | 45% ± 19.6%         | 32.7% ± 19.8%         | 22.3% ± 19.1%            |
| 130           | 49.9% ± 19.7%       | 28% ± 18%             | 22% ± 18.9%              |
| 93            | 27.5% ± 16.5%       | 36.3% ± 22%           | 36.2% ± 23.3%            |
| 131           | 58.1% ± 19.4%       | 23.7% ± 16.3%         | 18.2% ± 17.3%            |
| 202           | 41.5% ± 19%         | 21.7% ± 16.1%         | 36.8% ± 22.3%            |
| 117           | 49% ± 20.1%         | 32.4% ± 19.6%         | 18.7% ± 17.8%            |
| 90            | 50.5% ± 20%         | 28.3% ± 18.3%         | 21.3% ± 18.6%            |
| 89            | 58.4% ± 19.7%       | 24.8% ± 16.6%         | 16.9% ± 17.1%            |
| 94            | 55.5% ± 19.7%       | 25.8% ± 16.9%         | 18.7% ± 17.5%            |
| 123v1         | 42.6% ± 19.7%       | 36% ± 20.7%           | 21.4% ± 18.7%            |
| 115           | 57.4% ± 19.7%       | 26.3% ± 17.3%         | 16.3% ± 16.2%            |
| 140           | 63.4% ± 18.9%       | 19.8% ± 14.2%         | 16.8% ± 16.5%            |
| 114           | 62.2% ± 19.2%       | 22% ± 15.5%           | 15.8% ± 16.6%            |
| 204           | 32.6% ± 17.7%       | 34.6% ± 21%           | 32.8% ± 22.5%            |
| 86            | 63.6% ± 18.7%       | 20.3% ± 14.6%         | 16.1% ± 16%              |
| C1            | 62.7% ± 19.2%       | 21.4% ± 15.2%         | 15.9% ± 16.3%            |
| NWWG-09       | 22.9% ± 16.1%       | 48.4% ± 24.6%         | 28.8% ± 22.6%            |
| 73            | 37.3% ± 20.1%       | 42% ± 22.4%           | 20.7% ± 19.1%            |
| 76            | 33.8% ± 18.7%       | 41.1% ± 22.2%         | 25% ± 20.6%              |
| 80C           | 33.8% ± 18.9%       | 42.5% ± 22.7%         | 23.6% ± 20%              |
| 71            | 36.3% ± 19.4%       | 41.5% ± 22.4%         | 22.2% ± 19.8%            |
| 68            | 35% ± 19.3%         | 42.4% ± 22.6%         | 22.5% ± 20%              |
| 66            | 32.8% ± 18.6%       | 43.3% ± 22.9%         | 23.9% ± 20.1%            |
| 510           | 29.1% ± 18.3%       | 47.3% ± 23.7%         | 23.6% ± 20.6%            |
| D1            | 22.5% ± 15.9%       | 48.2% ± 24.6%         | 29.3% ± 22.6%            |
| 56            | 32.5% ± 19%         | 45.6% ± 23.3%         | 22% ± 19.8%              |
| 51            | 34.6% ± 19.1%       | 41.2% ± 22.5%         | 24.2% ± 20.3%            |
| 31            | 31% ± 18.6%         | 46.3% ± 23.7%         | 22.7% ± 19.9%            |
| 50            | 26.4% ± 16.3%       | 37% ± 22.3%           | 36.7% ± 23.4%            |
| 34            | 27.6% ± 17.7%       | 47.4% ± 23.9%         | 25.1% ± 21%              |
| K17           | 16.9% ± 12.9%       | 42.8% ± 24.4%         | 40.3% ± 24.8%            |
| 37            | 17% ± 13.7%         | 48.9% ± 25.4%         | 34.1% ± 24.2%            |
| 36            | 22% ± 15.7%         | 49.2% ± 24.7%         | 28.8% ± 22.7%            |
| 23            | 18.2% ± 15.4%       | 59.4% ± 25.4%         | 22.4% ± 20.9%            |
| 21A           | 24.7% ± 17%         | 51.2% ± 24.2%         | 24.1% ± 20.6%            |
| S1            | 22.5% ± 16.1%       | 48.5% ± 24.5%         | 29% ± 22.6%              |
| 21Lv2         | 18.1% ± 15%         | 56.9% ± 25.4%         | 24.9% ± 21.5%            |
| 17            | 19.4% ± 14.6%       | 47.7% ± 24.8%         | 32.9% ± 23.7%            |
| 16            | 13.2% ± 10.5%       | 30.6% ± 21.5%         | 56.2% ± 24.2%            |
| 33            | 13.5% ± 10.8%       | 33.3% ± 22.5%         | 53.3% ± 24.6%            |

|         |               |               |               |
|---------|---------------|---------------|---------------|
| B16     | 13.8% ± 12.7% | 55.4% ± 26.3% | 30.8% ± 24.2% |
| B22     | 14.6% ± 13.2% | 55.6% ± 25.8% | 29.7% ± 23.6% |
| NWWG-02 | 55.9% ± 19.8% | 27.3% ± 17.8% | 16.8% ± 17.1% |
| NWWG-16 | 27.8% ± 17.2% | 40.3% ± 22.9% | 31.9% ± 22.8% |
| H4      | 21% ± 15.6%   | 48.6% ± 24.8% | 30.5% ± 23.2% |
| 84      | 10.8% ± 9.2%  | 30.3% ± 21.6% | 58.9% ± 23.7% |
| NMS-18  | 23.3% ± 15.3% | 38.2% ± 22.8% | 38.4% ± 24%   |
| 14A     | 17.3% ± 13%   | 43.6% ± 24.5% | 39.1% ± 24.6% |
| K1v2    | 24.8% ± 15.8% | 12.4% ± 11.5% | 62.8% ± 21.1% |

---

69  
70  
71  
72  
73  
74  
75

**Table. S3.** Identified pyrolysis products, retention time, and their two fragment ions used to quantify and their assignment according to (Nierop et al., 2017). Types: Alk = *n*-alkenes/alkanes, Ar = aromatics or alkylbenzenes, Gua = guaiacols, Nt = N-containing compounds, Ph = phenols, Phy = phytadienes, Pri = pris-1-ene, Ps = polysaccharide-derived products, Syr = syringols. RT = retention time

| RT    | Pyrolysis product | <i>m/z</i> | Correction factor | Type |
|-------|-------------------|------------|-------------------|------|
| 9.47  | C <sub>11:1</sub> | 55+57      | 4.90              | Alk  |
| 9.70  | C <sub>11:0</sub> | 55+57      | 2.90              | Alk  |
| 11.50 | C <sub>12:1</sub> | 55+57      | 4.90              | Alk  |
| 11.76 | C <sub>12:0</sub> | 55+57      | 2.90              | Alk  |
| 13.50 | C <sub>13:1</sub> | 55+57      | 4.90              | Alk  |
| 13.72 | C <sub>13:0</sub> | 55+57      | 2.90              | Alk  |
| 15.45 | C <sub>14:1</sub> | 55+57      | 4.90              | Alk  |
| 15.57 | C <sub>14:0</sub> | 55+57      | 2.90              | Alk  |
| 17.15 | C <sub>15:1</sub> | 55+57      | 4.90              | Alk  |
| 17.32 | C <sub>15:0</sub> | 55+57      | 2.90              | Alk  |
| 18.82 | C <sub>16:1</sub> | 55+57      | 4.90              | Alk  |
| 18.98 | C <sub>16:0</sub> | 55+57      | 2.90              | Alk  |
| 20.40 | C <sub>17:1</sub> | 55+57      | 4.90              | Alk  |
| 20.55 | C <sub>17:0</sub> | 55+57      | 2.90              | Alk  |
| 21.90 | C <sub>18:1</sub> | 55+57      | 4.90              | Alk  |
| 22.05 | C <sub>18:0</sub> | 55+57      | 2.90              | Alk  |
| 23.30 | C <sub>19:1</sub> | 55+57      | 4.90              | Alk  |
| 23.48 | C <sub>19:0</sub> | 55+57      | 2.90              | Alk  |
| 24.70 | C <sub>20:1</sub> | 55+57      | 4.90              | Alk  |
| 24.82 | C <sub>20:0</sub> | 55+57      | 2.90              | Alk  |
| 26.00 | C <sub>21:1</sub> | 55+57      | 4.90              | Alk  |
| 26.12 | C <sub>21:0</sub> | 55+57      | 2.90              | Alk  |
| 27.26 | C <sub>22:1</sub> | 55+57      | 4.90              | Alk  |
| 27.36 | C <sub>22:0</sub> | 55+57      | 2.90              | Alk  |
| 28.45 | C <sub>23:1</sub> | 55+57      | 4.90              | Alk  |
| 28.55 | C <sub>23:0</sub> | 55+57      | 2.90              | Alk  |
| 29.59 | C <sub>24:1</sub> | 55+57      | 4.90              | Alk  |
| 29.69 | C <sub>24:0</sub> | 55+57      | 2.90              | Alk  |
| 30.69 | C <sub>25:1</sub> | 55+57      | 4.90              | Alk  |
| 30.79 | C <sub>25:0</sub> | 55+57      | 2.90              | Alk  |
| 31.75 | C <sub>26:1</sub> | 55+57      | 4.90              | Alk  |
| 31.85 | C <sub>26:0</sub> | 55+57      | 2.90              | Alk  |
| 32.76 | C <sub>27:1</sub> | 55+57      | 4.90              | Alk  |
| 32.86 | C <sub>27:0</sub> | 55+57      | 2.90              | Alk  |
| 33.74 | C <sub>28:1</sub> | 55+57      | 4.90              | Alk  |
| 33.84 | C <sub>28:0</sub> | 55+57      | 2.90              | Alk  |
| 34.69 | C <sub>29:1</sub> | 55+57      | 4.90              | Alk  |

|       |                              |         |      |     |
|-------|------------------------------|---------|------|-----|
| 34.79 | C <sub>29:0</sub>            | 55+57   | 2.90 | Alk |
| 35.60 | C <sub>30:1</sub>            | 55+57   | 4.90 | Alk |
| 35.71 | C <sub>30:0</sub>            | 55+57   | 2.90 | Alk |
| 36.51 | C <sub>31:1</sub>            | 55+57   | 4.90 | Alk |
| 36.60 | C <sub>31:0</sub>            | 55+57   | 2.90 | Alk |
| 1.84  | Benzene                      | 78      | 1.90 | Ar  |
| 2.97  | Toluene                      | 91+92   | 1.37 | Ar  |
| 4.50  | Ethylbenzene                 | 91+106  | 1.60 | Ar  |
| 4.68  | 1,3- and 1,4-Dimethylbenzene | 91+106  | 1.60 | Ar  |
| 5.01  | Styrene                      | 103+104 | 2.06 | Ar  |
| 5.10  | 1,2-Dimethylbenzene          | 91+106  | 1.60 | Ar  |
| 9.02  | Guaiacol                     | 109+124 | 1.92 | Gua |
| 11.21 | 4-Methylguaiacol             | 123+138 | 2.37 | Gua |
| 12.92 | 4-Ethylguaiacol              | 137+152 | 1.24 | Gua |
| 13.57 | 4-Vinylguaiacol              | 135+150 | 2.37 | Gua |
| 14.39 | Eugenol                      | 149+164 | 4.19 | Gua |
| 15.33 | <i>cis</i> -Isoeugenol       | 149+164 | 4.19 | Gua |
| 16.06 | <i>trans</i> -Isoeugenol     | 149+164 | 4.19 | Gua |
| 16.58 | 4-Acetylguaiacol             | 151+166 | 4.12 | Gua |
| 2.53  | Pyridine                     | 52+79   | 1.97 | Nt  |
| 2.69  | Pyrrole                      | 67      | 1.67 | Nt  |
| 3.98  | 2-Methylpyrrole              | 80+81   | 1.54 | Nt  |
| 4.19  | 3-Methylpyrrole              | 80+81   | 1.54 | Nt  |
| 4.36  | 4-Methylpyridine             | 66+93   | 1.93 | Nt  |
| 9.67  | Benzyl nitrile               | 90+117  | 2.38 | Nt  |
| 11.68 | Methylbenzyl nitrile         | 91+131  | 2.24 | Nt  |
| 13.11 | Indole                       | 90+117  | 2.05 | Nt  |
| 14.85 | Methylindole                 | 130+131 | 2.73 | Nt  |
| 20.05 | Diketodipyrrole              | 93+186  | 3.21 | Nt  |
| 21.64 | Diketopiperazine             | 70+154  | 5.20 | Nt  |
| 23.20 | Diketopiperazine             | 70+194  | 5.20 | Nt  |
| 23.22 | Diketopiperazine             | 70+154  | 5.20 | Nt  |
| 7.17  | Phenol                       | 66+94   | 1.72 | Ph  |
| 8.62  | 2-Methylphenol               | 107+108 | 2.93 | Ph  |
| 9.10  | 3/4-Methylphenol             | 107+108 | 2.35 | Ph  |
| 10.95 | 4-Ethylphenol                | 107+122 | 1.76 | Ph  |
| 12.04 | 4-Vinylphenol                | 91+120  | 1.78 | Ph  |
| 12.13 | Catechol                     | 64+110  | 2.42 | Ph  |
| 22.58 | Neophytadiene                | 68+82   | 5.79 | Phy |
| 22.91 | <i>cis</i> -1,3-Phytadiene   | 68+82   | 6.80 | Phy |
| 23.19 | <i>trans</i> -1,3-Phytadiene | 68+82   | 6.80 | Phy |
| 21.02 | Prist-1-ene                  | 56+57   | 3.44 | Pri |
| 3.75  | 2-Furaldehyde                | 95+96   | 1.60 | Ps  |

|       |                                        |         |      |     |
|-------|----------------------------------------|---------|------|-----|
| 6.20  | 5-Methyl-2-furaldehyde                 | 109+110 | 1.80 | Ps  |
| 6.93  | 4-Hydroxy-5,6-dihydro-(2H)-pyran-2-one | 58+114  | 1.60 | Ps  |
| 9.02  | Levogluconone                          | 96+98   | 4.59 | Ps  |
| 17.81 | Levogluconan                           | 60+73   | 2.10 | Ps  |
| 14.14 | Syringol                               | 139+154 | 2.38 | Syr |
| 15.93 | 4-Methylsyringol                       | 153+168 | 2.94 | Syr |
| 17.32 | 4-Ethylsyringol                        | 167+182 | 1.28 | Syr |
| 17.94 | 4-Vinylsyringol                        | 165+180 | 3.03 | Syr |
| 18.57 | 4-Allylsyringol                        | 179+194 | 3.08 | Syr |
| 19.37 | <i>cis</i> -4-Prop-2-enylsyringol      | 179+194 | 3.08 | Syr |
| 20.14 | <i>trans</i> -4-Prop-2-enylsyringol    | 179+194 | 3.08 | Syr |
| 20.57 | 4-Acetylsyringol                       | 181+196 | 3.90 | Syr |

82  
83  
84  
85  
86  
87



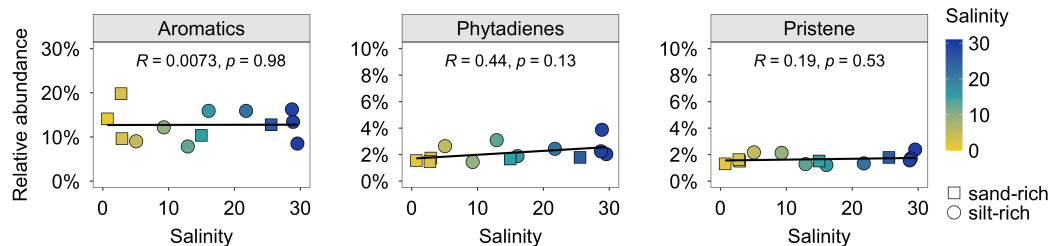

**Fig. S1.** Relative abundance of aromatics, phytadienes, and prist-1-ene in MOM pyrolysis products.

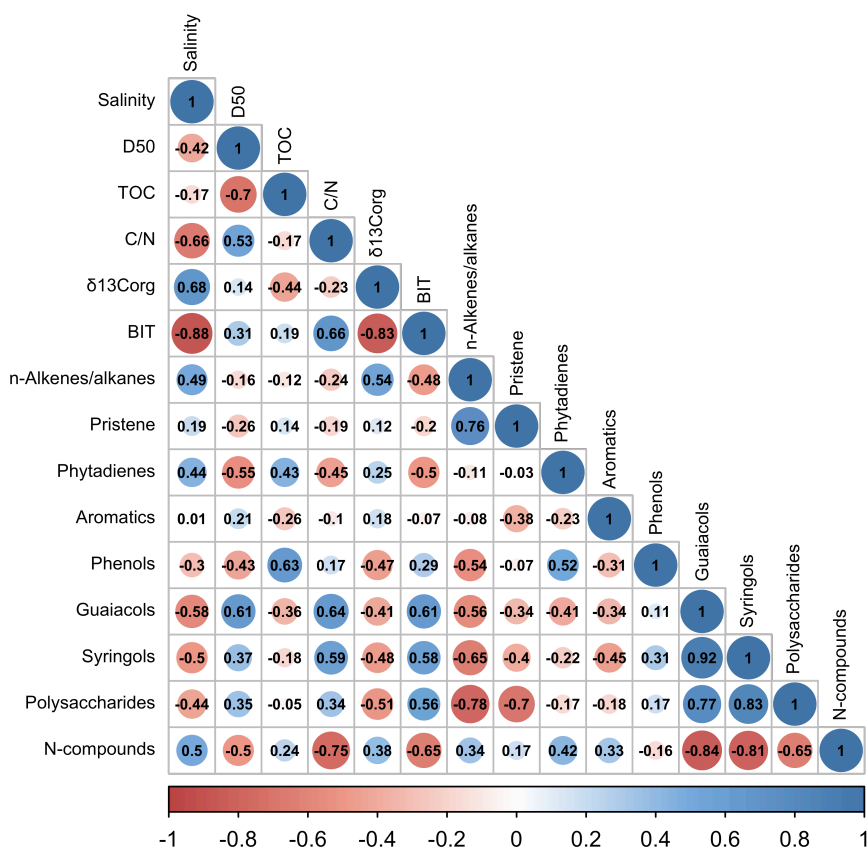

**Fig. S2.** The Pearson's correlation matrix of major sediment properties (i.e. salinity, D50, TOC) with sediment OM source proxies (i.e. CN, BIT index, and MOM pyrolysis products).

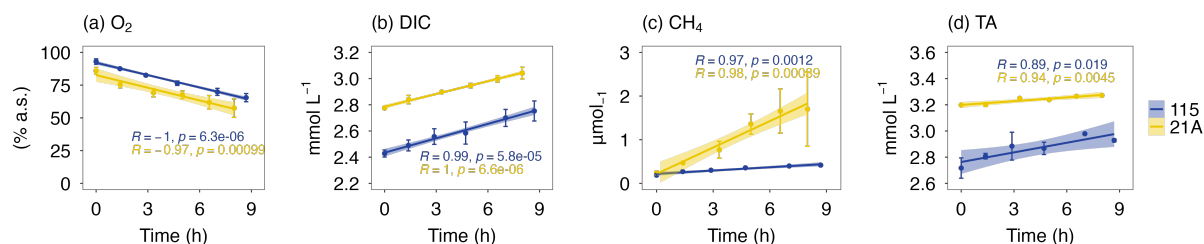

**Fig. S3.** The concentration of dissolved O<sub>2</sub>, DIC, CH<sub>4</sub> and TA in the overlaying water over time during intact sediment core incubation.

### Estimation of contribution by OM degradation to sedimentary DIC efflux

We correct the measured total DIC fluxes, calculated from time series shown in Fig. S3, for sources other than oxic and anaerobic OM degradation, e.g. CaCO<sub>3</sub> dissolution. In our approach, we consider sulfate reduction, estimated from benthic sulfate diffusive rate, and CaCO<sub>3</sub> dissolution as the main total alkalinity (TA) sources with DIC:TA ratios of 1:1 and 2:1, respectively. The SO<sub>4</sub><sup>2-</sup>:TA stoichiometry of sulfate reduction is assumed to be 1:2, the theoretical ideal stoichiometry that has also been found experimentally in organic-rich coastal sediment (Burdige, 2012; Rassmann et al., 2020). Note that aerobic OM degradation does not contribute to TA. Porewater data indicated that other anaerobic OM degradation pathways (e.g. Fe-(oxyhydr)oxides reduction, methanogenesis) were minor compared to sulfate reduction in the surface sediment, thus not considered in the DIC<sub>OM</sub> calculation.

Here, we assume that the diffusive sulfate flux across the sediment-water interface represents the sulfate reduction rate in the uppermost sediment that contributes to the TA and DIC efflux. Sulfate reduction in the uppermost sediment is assumed to arise from organoclastic sulfate reduction (not e.g. CH<sub>4</sub> oxidation) and therefore contributes to DIC production from OM degradation (Jørgensen, 2021). Sulfate diffusive fluxes were calculated from the measured sulfate concentration gradients between the bottom water and porewater in the uppermost sediment (0–0.5 cm, average 0.25 cm below sediment-water interface; Table S4) using Fick's first law:

$$J = -\varphi \times D_{sed} \times \frac{dC}{dz}$$

where  $J$  is the diffusive flux (mmol m<sup>-2</sup> d<sup>-1</sup>),  $D_{sed}$  is the diffusion coefficient in sediment (m<sup>2</sup> d<sup>-1</sup>) and  $dC/dz$  is the concentration gradient at the sediment-water interface (mol m<sup>-4</sup>). The RStudio package 'marelac' (Soetaert et al., 2023) was used to calculate sulfate diffusion coefficients in water ( $D_w$ ) for site 115 (salinity 29) and 21A (salinity 5). The temperature applied in the equation was 19 °C as measured during field work in summer 2021. To calculate the  $D_{sed}$  from the diffusion coefficient in water ( $D_w$ ) porosity of 0.95 was used for the uppermost fine-grained sediment at both locations to correct for the tortuosity effect:

$$D_{sed} = \frac{D_w}{1 - 2 \times \log(porosity)}$$

**Table S4.** Key parameters for calculation of diffusive sulfate fluxes in the surface sediment.

| Site           | Species                       | BW      | Sed (0.25 cm) | $D_{sed}$ (m <sup>2</sup> d <sup>-1</sup> ) | $J_{SO_4}$ (mmol m <sup>-2</sup> d <sup>-1</sup> ) |
|----------------|-------------------------------|---------|---------------|---------------------------------------------|----------------------------------------------------|
| 115 (marine)   | SO <sub>4</sub> <sup>2-</sup> | 25.0 mM | 23.9 mM       | 6.85e-5                                     | -28.6                                              |
| 21A (riverine) | SO <sub>4</sub> <sup>2-</sup> | 4.5 mM  | 3.9 mM        | 7.2e-5                                      | -16.4                                              |

The TA flux from sulfate reduction was obtained by multiplying the  $\text{SO}_4^{2-}$  flux by a factor of 2 ( $\text{SO}_4^{2-}$ :TA of the reaction is 1:2). Assuming that the remaining TA flux can be ascribed to  $\text{CaCO}_3$  dissolution, the corrected alkalinity flux was then used to estimate DIC efflux from  $\text{CaCO}_3$  dissolution (TA:DIC of  $\text{CaCO}_3$  dissolution is 2:1). The  $\text{DIC}_{\text{CaCO}_3}$  was then used to calculate the OM-derived DIC flux,  $\text{DIC}_{\text{OM}}$  (Table S5).

**Table S5.** Simplified mass balance for benthic DIC and TA fluxes at sites 115 and 21A.  $f_{\text{DIC-OM}}$  represents the fraction of the DIC efflux that can be attributed to OM degradation.

| Site           | DIC<br>( $\text{mmol m}^{-2} \text{d}^{-1}$ ) | TA    | $\text{TA}_{\text{SO}_4}$ | $\text{DIC}_{\text{CaCO}_3}$ | $\text{DIC}_{\text{OM}}$ | $f_{\text{DIC-OM}}$<br>na |
|----------------|-----------------------------------------------|-------|---------------------------|------------------------------|--------------------------|---------------------------|
| 115 (marine)   | 158±52                                        | 96±28 | 57.2                      | 20±14                        | 139±53                   | 0.88±0.4                  |
| 21A (riverine) | 122± 27                                       | 41±8  | 32.8                      | 4±4                          | 118±27                   | 0.97±0.3                  |

The relatively low contribution of  $\text{CaCO}_3$  dissolution to DIC efflux, 3–12 %, aligns with previous work that emphasizes the dominant role of OM degradation in DIC fluxes from (organic-rich) non-carbonate coastal sediment (Krumins et al., 2013).

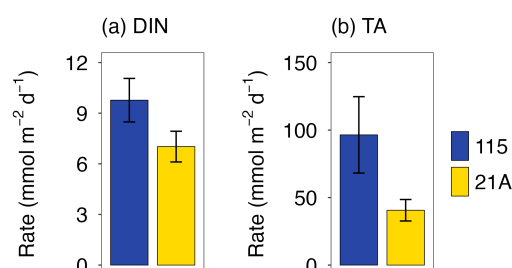

**Fig. S4.** Benthic fluxes of (a) dissolved inorganic nitrogen (DIN) and (b) total alkalinity (TA) determined from whole-core incubation. Error bars represent the standard deviation from triplicate core incubations.

# Benthic diffusive fluxes of Fe<sup>2+</sup> and HS<sup>-</sup>

Diffusion fluxes of Fe<sup>2+</sup> and HS<sup>-</sup> were calculated the same way as SO<sub>4</sub><sup>2-</sup> diffusing fluxes using Fick's first law. Table S6 presents key data for the calculation.

**Table. S6** Benthic diffusive fluxes of Fe<sup>2+</sup> and HS<sup>-</sup> for sediment 115 and 21A.

| Site           | Species          | BW       | Sed (0.25 cm) | D <sub>sed</sub> (m <sup>2</sup> d <sup>-1</sup> ) | J (mmol m <sup>-2</sup> d <sup>-1</sup> ) |
|----------------|------------------|----------|---------------|----------------------------------------------------|-------------------------------------------|
| 115 (marine)   | Fe <sup>2+</sup> | 0.25 μM  | 2.7 μM        | 4.54e-5                                            | 0.04                                      |
| 21A (riverine) | Fe <sup>2+</sup> | 0.24 μM  | 0.87 μM       | 4.78e-5                                            | 0.01                                      |
| 115 (marine)   | HS <sup>-</sup>  | 0 mM     | 0 mM          | 1.16e-4                                            | 0                                         |
| 21A (riverine) | HS <sup>-</sup>  | 0.003 mM | 0.004 mM      | 1.22e-4                                            | 0.05                                      |

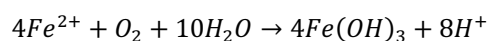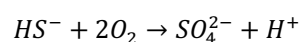

Assuming all upward diffusing fluxes of Fe<sup>2+</sup> and HS<sup>-</sup> were completely oxidized by O<sub>2</sub>, the oxidation rates were ~ 0.1 mmol m<sup>-2</sup> d<sup>-1</sup> for both site 115 and 21A, which contributed to less than 1% of the total O<sub>2</sub> consumption rates for both sites.

## References

- Al-Shammary, A. A. G., Kouzani, A. Z., Kaynak, A., Khoo, S. Y., Norton, M., and Gates, W.: Soil Bulk Density Estimation Methods: A Review, *Pedosphere*, 28, 581–596, [https://doi.org/10.1016/s1002-0160\(18\)60034-7](https://doi.org/10.1016/s1002-0160(18)60034-7), 2018.
- Burdige, D. J.: *Estuarine and Coastal Sediments - Coupled Biogeochemical Cycling*, Elsevier Inc., 279–316 pp., <https://doi.org/10.1016/B978-0-12-374711-2.00511-8>, 2012.
- Harpenslager, S. F., Van Dijk, G., Kosten, S., Roelofs, J. G. M., Smolders, A. J. P., and Lamers, L. P. M.: Simultaneous high C fixation and high C emissions in Sphagnum mires, *Biogeosciences*, 12, 4739–4749, <https://doi.org/10.5194/bg-12-4739-2015>, 2015.
- Jørgensen, B. B.: Sulfur Biogeochemical Cycle of Marine Sediments, *Geochem Perspect*, 10, 145–303, <https://doi.org/10.7185/GEOCHEMPERSP.10.2>, 2021.
- Krumins, V., Gehlen, M., Arndt, S., Van Cappellen, P., and Regnier, P.: Dissolved inorganic carbon and alkalinity fluxes from coastal marine sediments: Model estimates for different shelf environments and sensitivity to global change, *Biogeosciences*, 10, 371–398, <https://doi.org/10.5194/bg-10-371-2013>, 2013.
- Nierop, K. G. J., Reichart, G. J., Veld, H., and Sinninghe Damsté, J. S.: The influence of oxygen exposure time on the composition of macromolecular organic matter as revealed by surface sediments on the Murray Ridge (Arabian Sea), *Geochim Cosmochim Acta*, 206, 40–56, <https://doi.org/10.1016/j.gca.2017.02.032>, 2017.
- Rassmann, J., Eitel, E. M., Lansard, B., Cathalot, C., Brandily, C., Taillefert, M., and Rabouille, C.: Benthic alkalinity and dissolved inorganic carbon fluxes in the Rhône River prodelta generated by decoupled aerobic and anaerobic processes, *Biogeosciences*, 17, 13–33, <https://doi.org/10.5194/bg-17-13-2020>, 2020.
- Soetaert, K., Petzoldt, T., Meysman, F., and Meire, L.: *marelac: Tools for Aquatic Sciences*, 2023.
